# Supplementary material for: In Silico Docking, Molecular Dynamics and Binding Energy Insights into the Bolinaquinone-Clathrin Terminal Domain Binding Site
Source: Molecules. 2014 May 22;19(5):6609–22. doi: 10.3390/molecules19056609 (PMC6270888; doi:10.3390/molecules19056609)
Supplement: Supplementary file 1 [file molecules-19-06609-s001.pdf]

## Supplementary Materials

**Figure S1.** Clustering of pitstop 1 docked poses (stick representation) into clathrin TD (3XVG). The major cluster (green) is shown at the clathrin-box binding pocket.

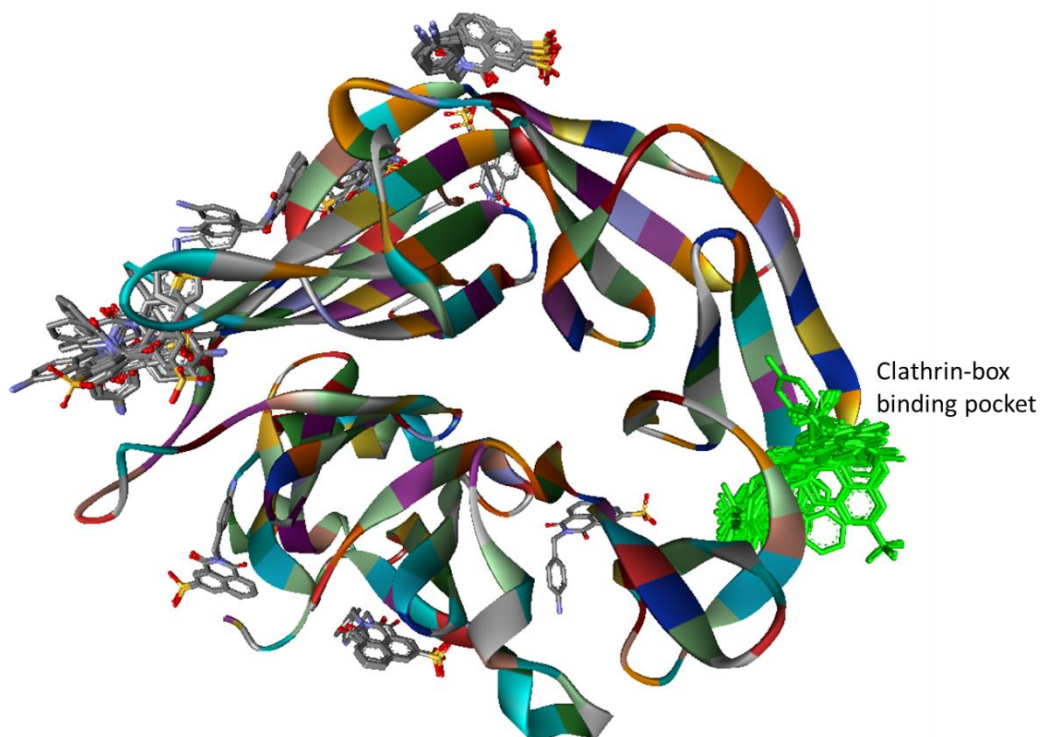

**Figure S2.** Superimposition of the CTD backbone (ribbon representation) for crystal structures 1UTC (orange), 3GC3 (green) and 2XZG (blue) showing identical orientation for major enzyme loops.

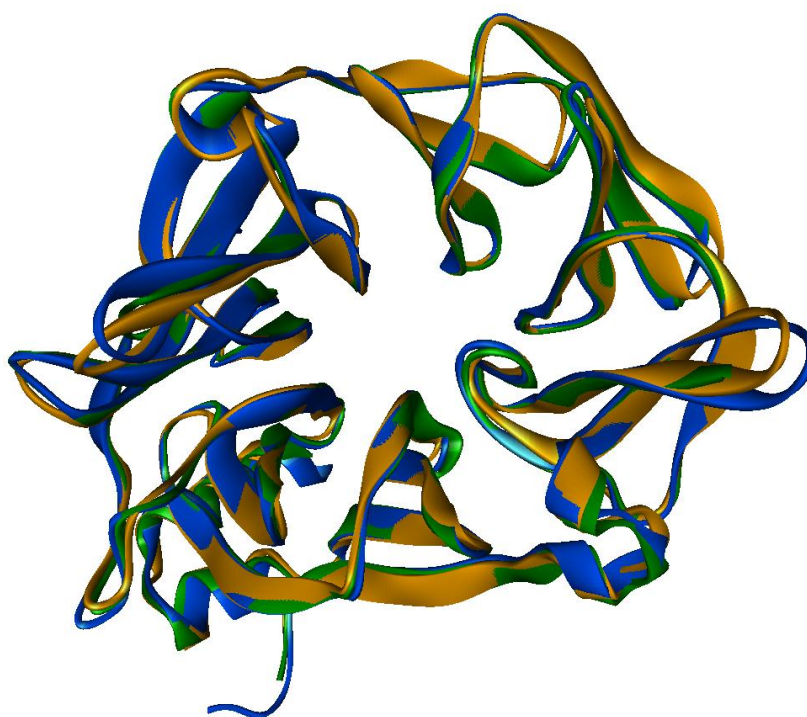

**Table S1.** Experimental and LIE binding free energy (kcal/mol) for Pitstops at the clathrin TD.

| Compound No. <sup>a</sup> | IC <sub>50</sub> <sup>a</sup> | $\Delta G_{\text{exp}}$ (kcal/mol) | $\Delta G_{\text{pred}}$ (kcal/mol) |
|---------------------------|-------------------------------|------------------------------------|-------------------------------------|
| 18                        | 18                            | −5.60                              | −5.51                               |
| 24                        | 10                            | −6.42                              | −6.53                               |
| 25                        | 6.9                           | −6.94                              | −7.15                               |
| 26                        | 22                            | −5.32                              | −5.21                               |
| 27                        | 16                            | −5.77                              | −5.54                               |
| 28                        | 15                            | −5.86                              | −6.1                                |
| 32                        | 12                            | −6.17                              | −6.32                               |
| 33                        | 10                            | −6.42                              | −6.45                               |
| 34                        | 15                            | −5.86                              | −5.47                               |

<sup>a</sup> Compound numbers and activity data are according to reference s1.

## Reference

- S1. MacGregor, K.A.; Robertson, M.J.; Young, K.A.; von Kleist, L.; Stahlschmidt, W.; Whiting, A.; Chau, N.; Robinson, P.J.; Haucke, V.; McCluskey, A. Development of 1,8-naphthalimides as clathrin Inhibitors. *J. Med. Chem.* **2014**, *57*, 131–143.
